# Supplementary material
Source: MDPI journal article supplement (https://www.mdpi.com/1424-8247/17/5/656)
Supplement: s1 [file s1]

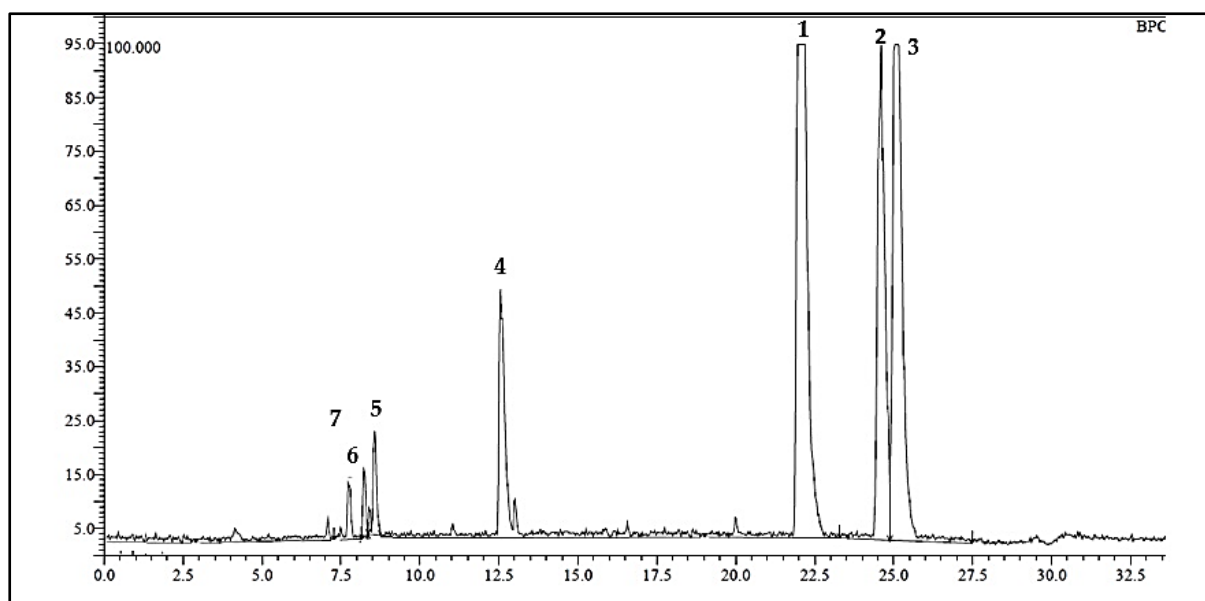

Figure S1: Negative ionization mode chromatogram representing the major compounds identified from the fungal ethyl acetate extract numbered according to their relative abundance where 1) heptelidic acid, 2) ferulic acid, 3) oleic acid, 4) paxilline, 5) indole, 6) orientin and 7) kojic acid.
